# Supplementary material
Source: publisher figshare collection journal article supplement (https://acs.figshare.com/ndownloader/files/24168804)
Supplement: Supplementary file 1 [file 24168804]

**Supporting Information for**  
**Structures, Electronic and Spectral Properties of Doped Boron**  
**Clusters  $\text{MB}_{12}^{0/-}$  (M=Li, Na, and K)**

Shi-Xiong Li,<sup>\*,†</sup> Zheng-Ping Zhang,<sup>‡</sup> Zheng-Wen Long,<sup>§</sup> and De-Liang Chen<sup>†</sup>

<sup>†</sup>School of Physics and Electronic Science, Guizhou Education University, Guiyang 550018, China.

<sup>‡</sup>College of Big Data and Information Engineering, Guizhou University, Guiyang 550025, China.

<sup>§</sup>College of physics, Guizhou University, Guiyang 550025, China

\*email: [leesxoptics@163.com](mailto:leesxoptics@163.com)

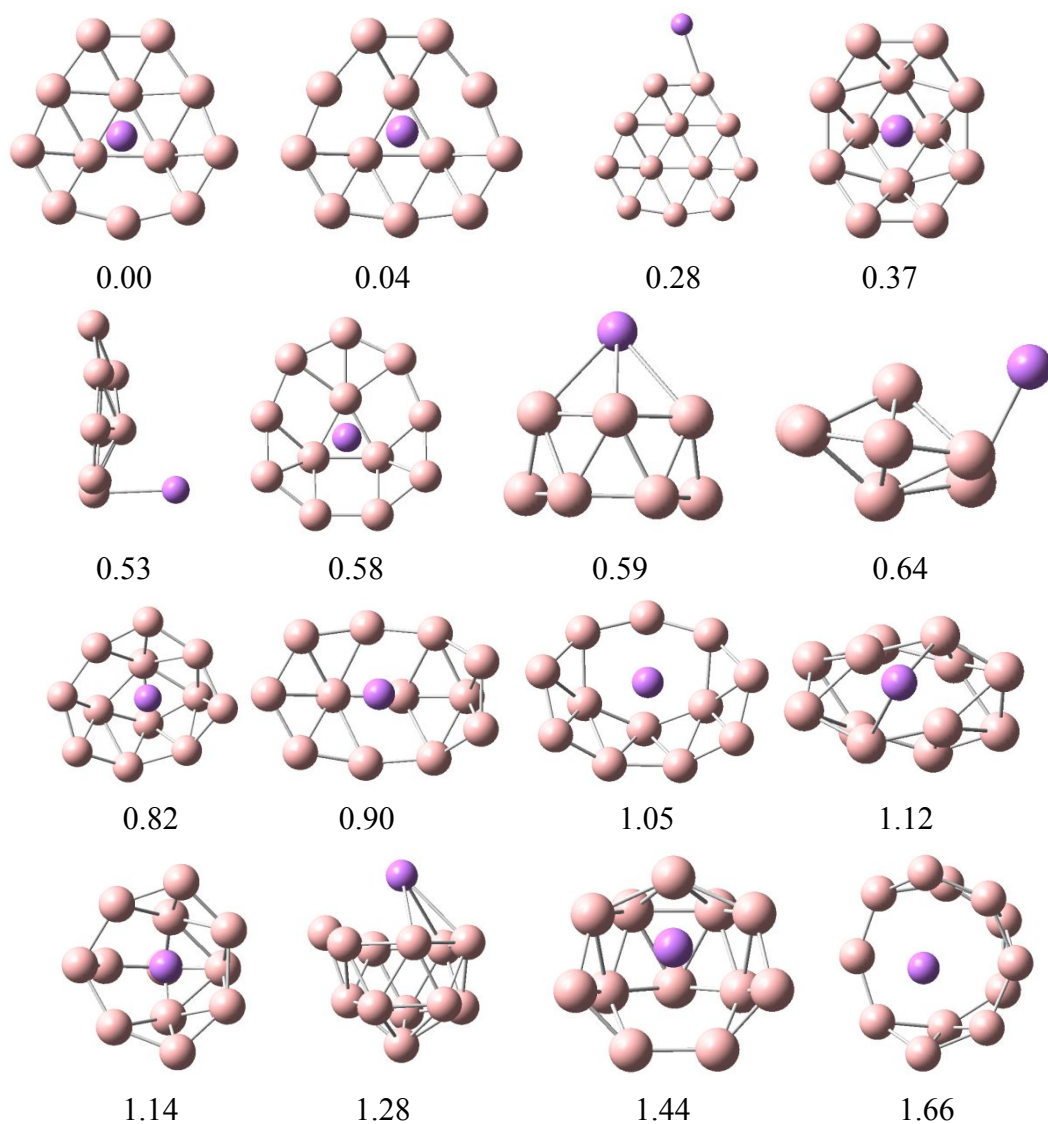

**Figure S1.** Low-lying isomers of  $\text{LiB}_{12}$ , with their relative energies indicated in eV at PBE0/def2-TZVP level.

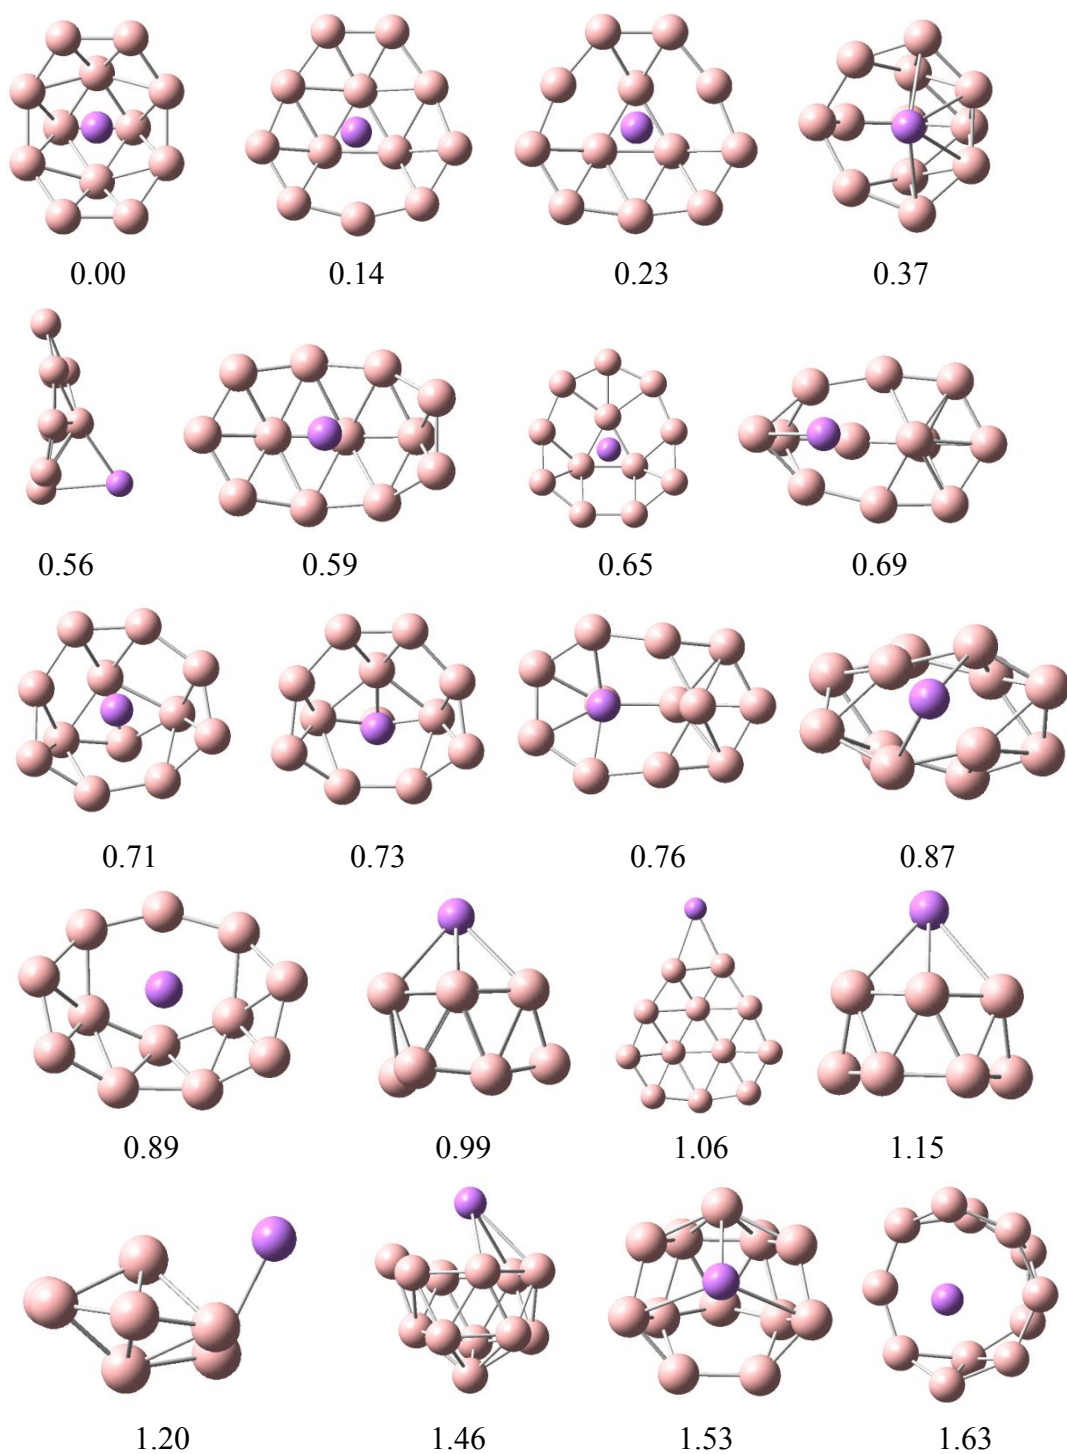

**Figure S2.** Low-lying isomers of  $\text{LiB}_{12}^-$ , with their relative energies indicated in eV at PBE0/def2-TZVP level.

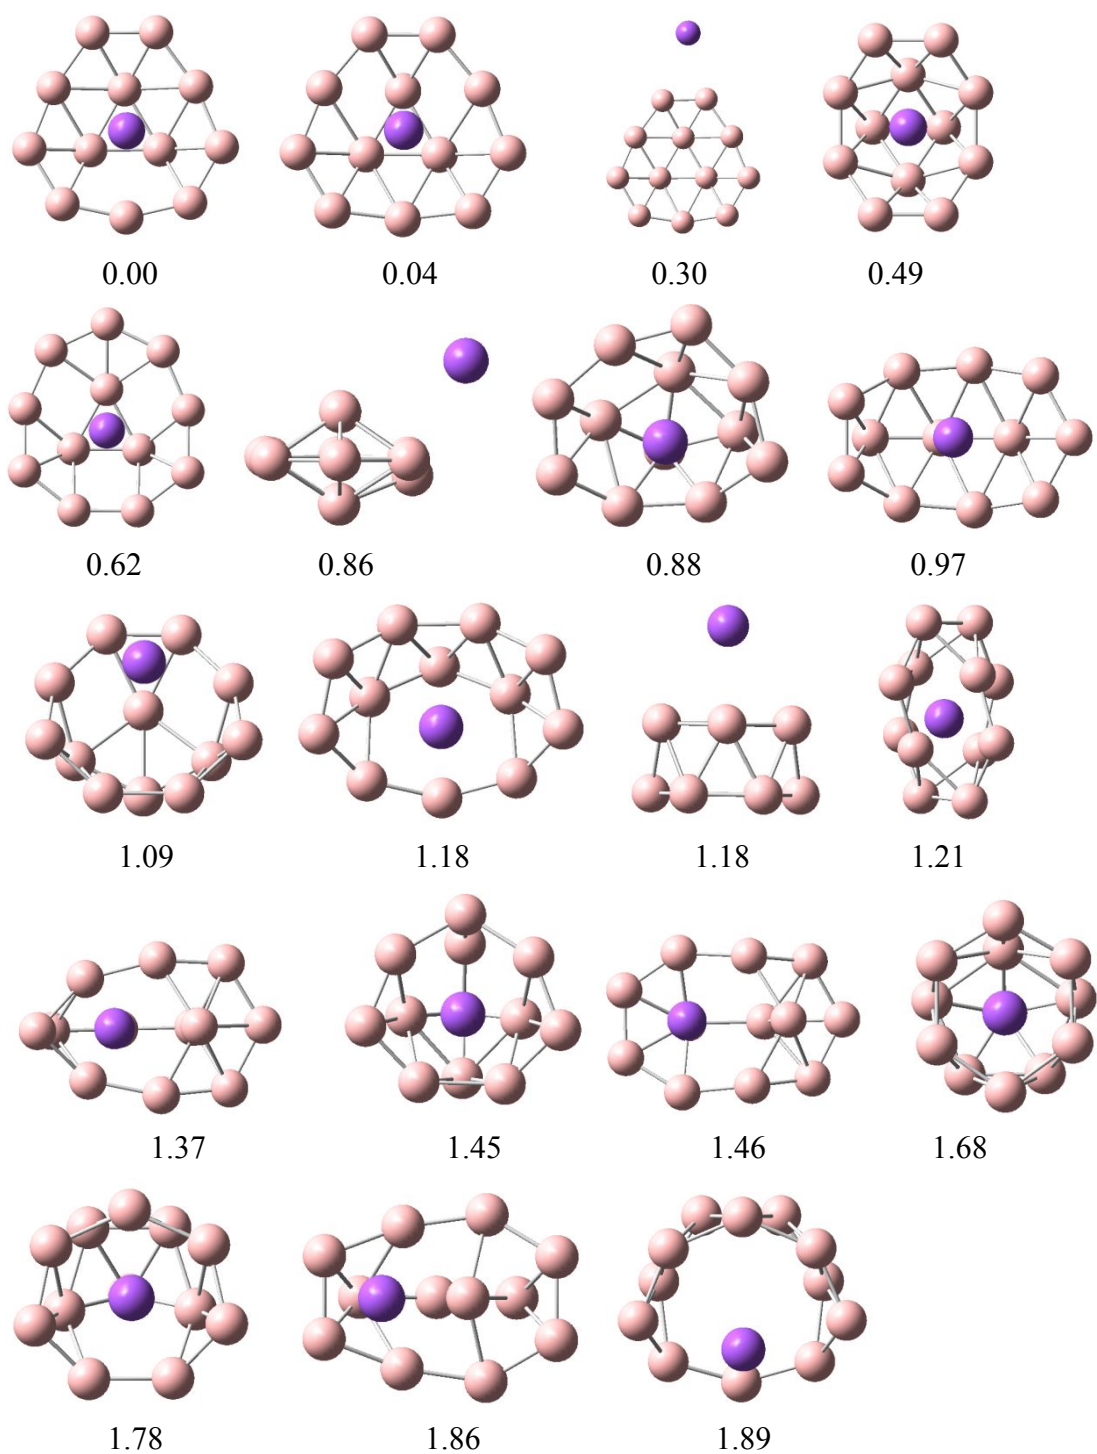

**Figure S3.** Low-lying isomers of  $\text{NaB}_{12}$ , with their relative energies indicated in eV at PBE0/def2-TZVP level.

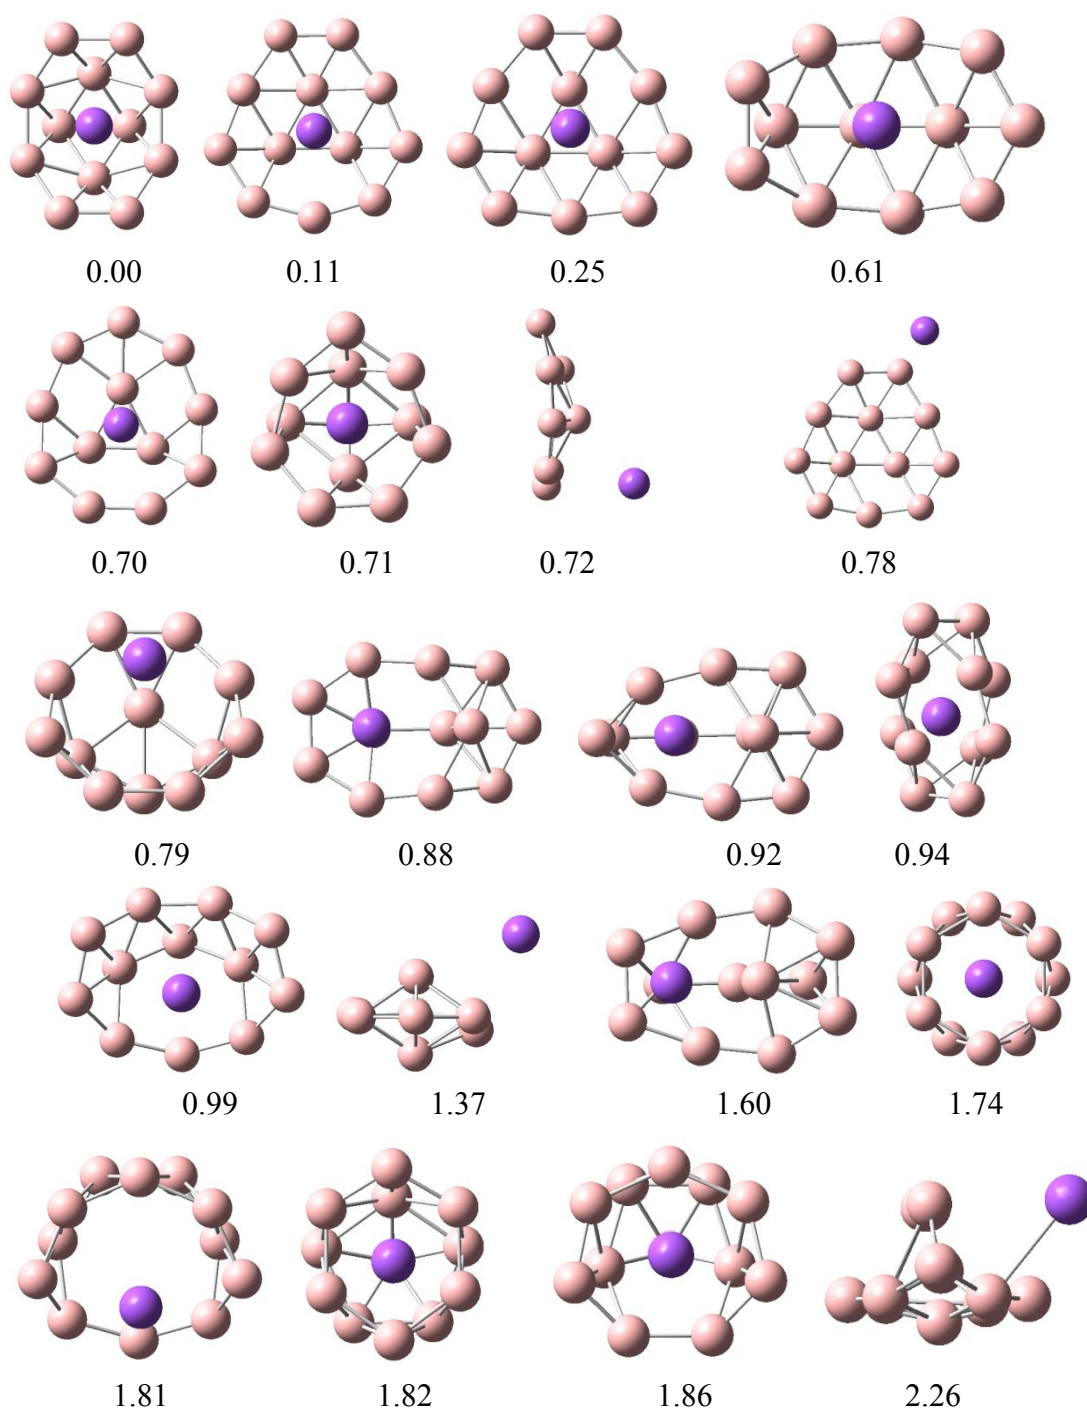

**Figure S4.** Low-lying isomers of  $\text{NaB}_{12}^-$ , with their relative energies indicated in eV at PBE0/def2-TZVP level.

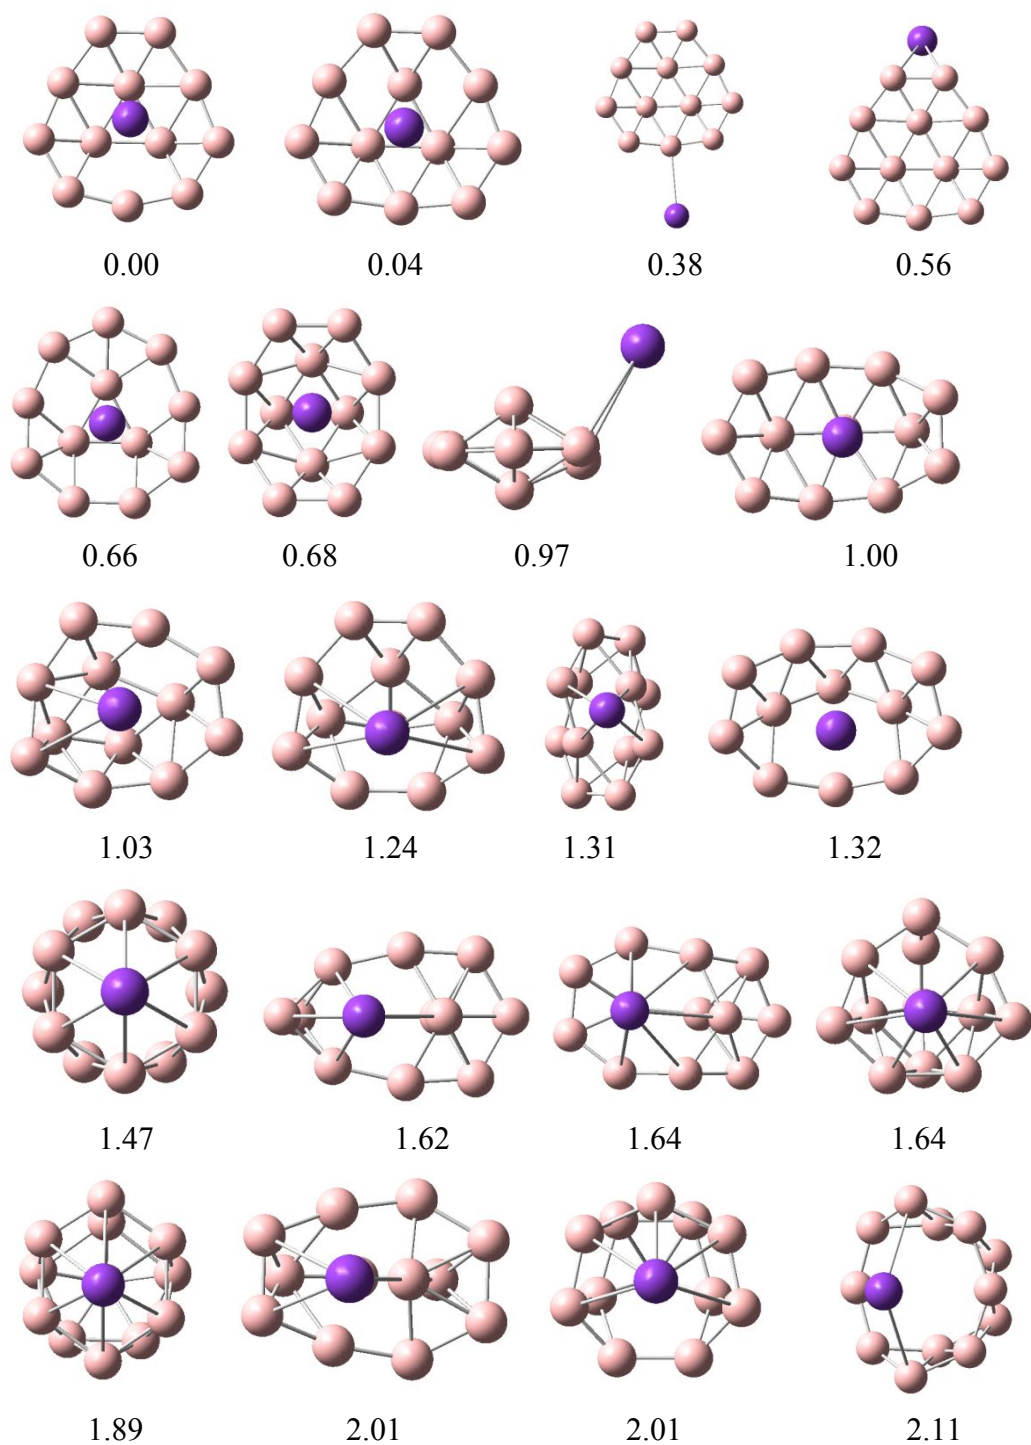

**Figure S5.** Low-lying isomers of  $\text{KB}_{12}$ , with their relative energies indicated in eV at PBE0/def2-TZVP level.

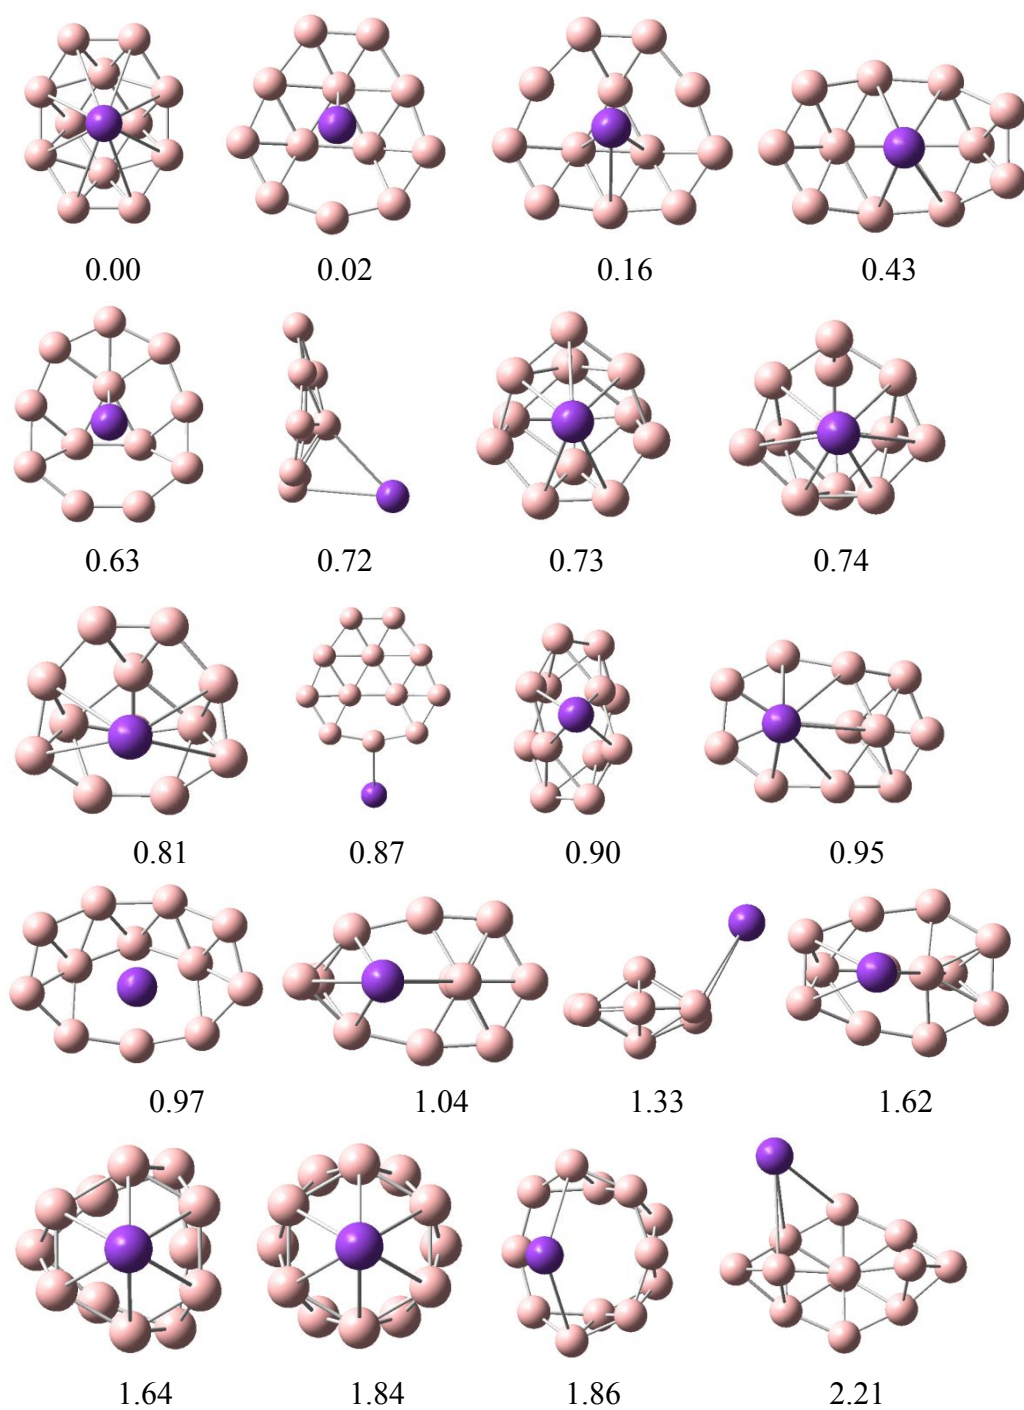

**Figure S6.** Low-lying isomers of  $\text{KB}_{12}^-$ , with their relative energies indicated in eV at PBE0/def2-TZVP level.

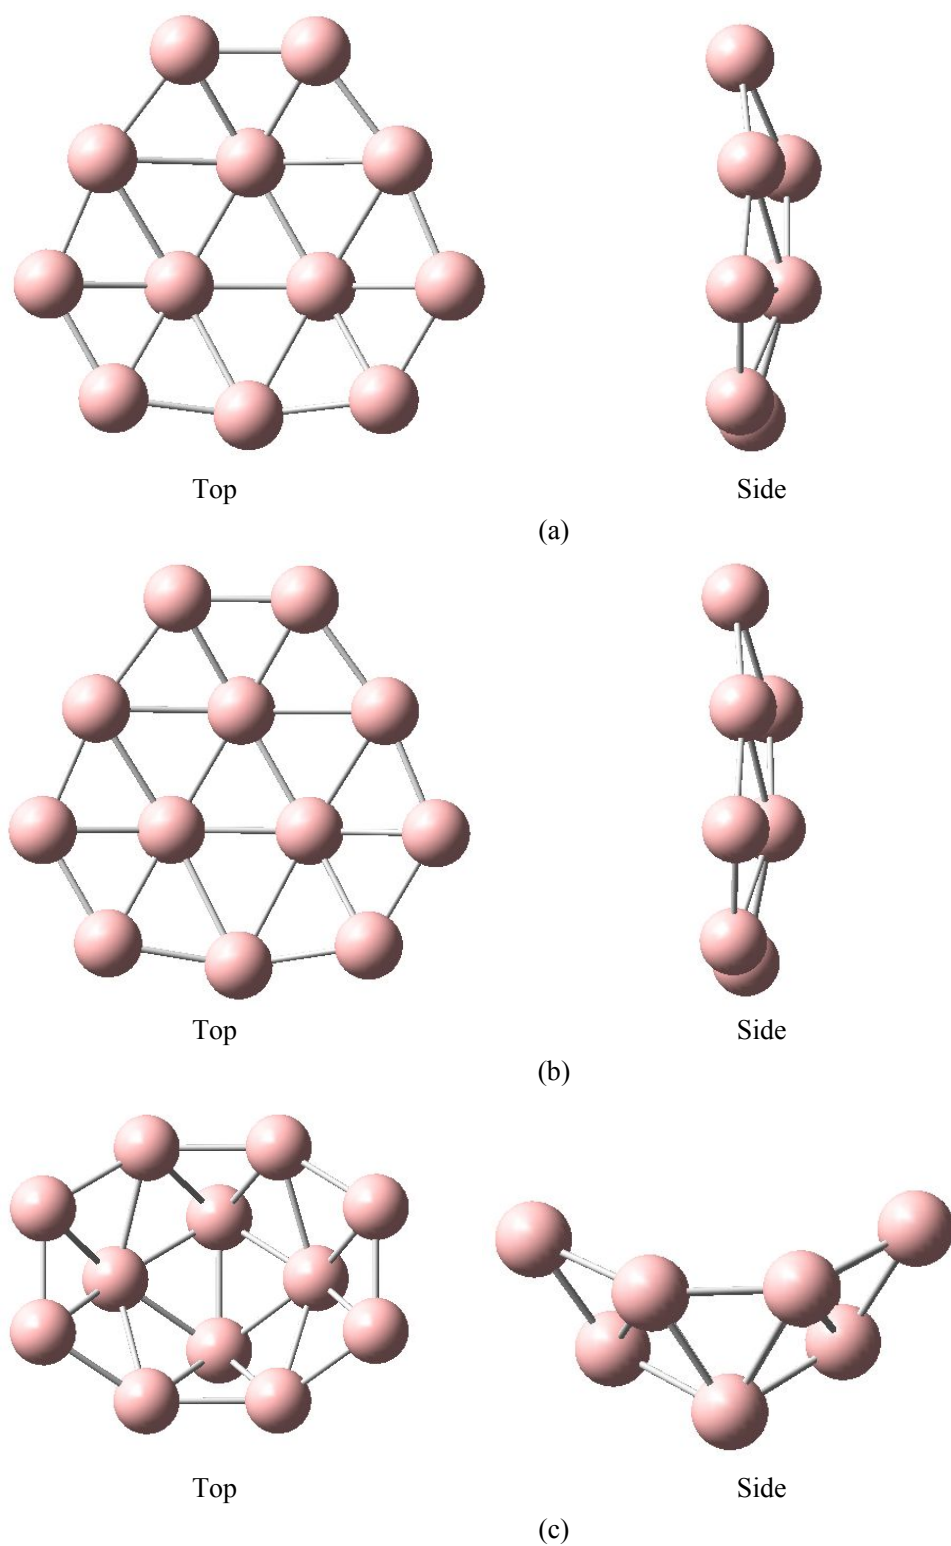

**Figure S7.** Structures of boron clusters  $B_{12}^{0/-}$ . (a)  $C_{3v} B_{12}$ , (b)  $C_s B_{12}^-$ , (c)  $C_{2v} B_{12}^{0/-}$ .

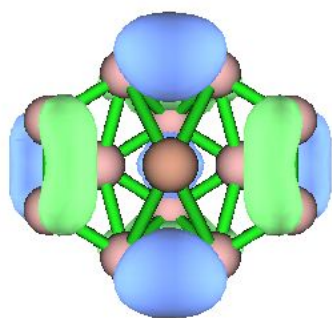

Top

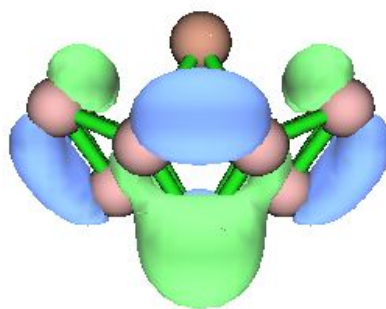

Side

(a)  $C_{2v}$   $LiB_{12}^-$  HOMO (-1.39 eV)

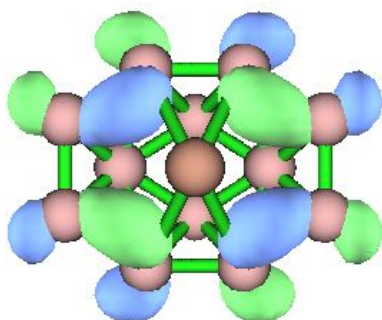

Top

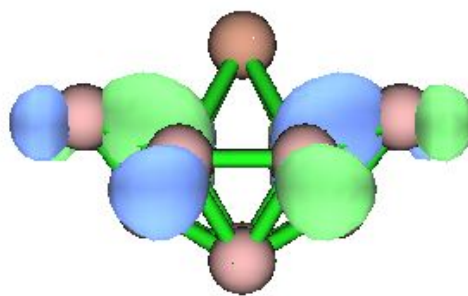

Side

(b)  $C_{2v}$   $LiB_{12}^-$  LUMO (2.02 eV)

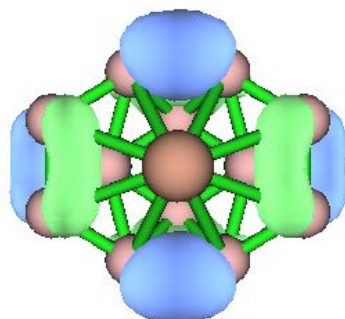

Top

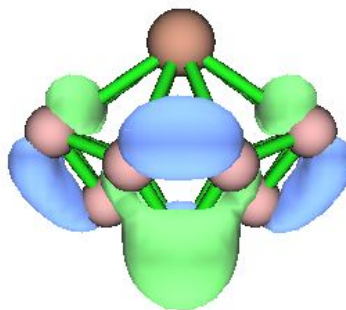

Side

(c)  $C_{2v}$   $NaB_{12}^-$  HOMO (-1.23eV)

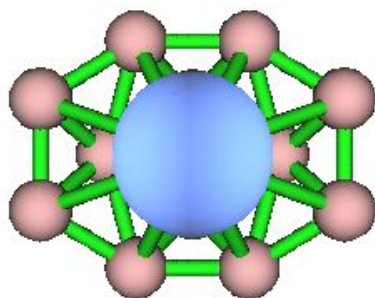

Top

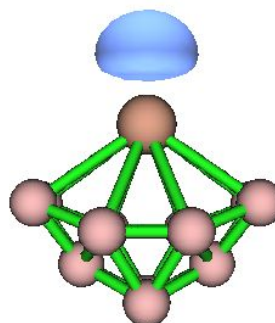

Side

(d)  $C_{2v}$   $NaB_{12}^-$  LUMO (2.00eV)

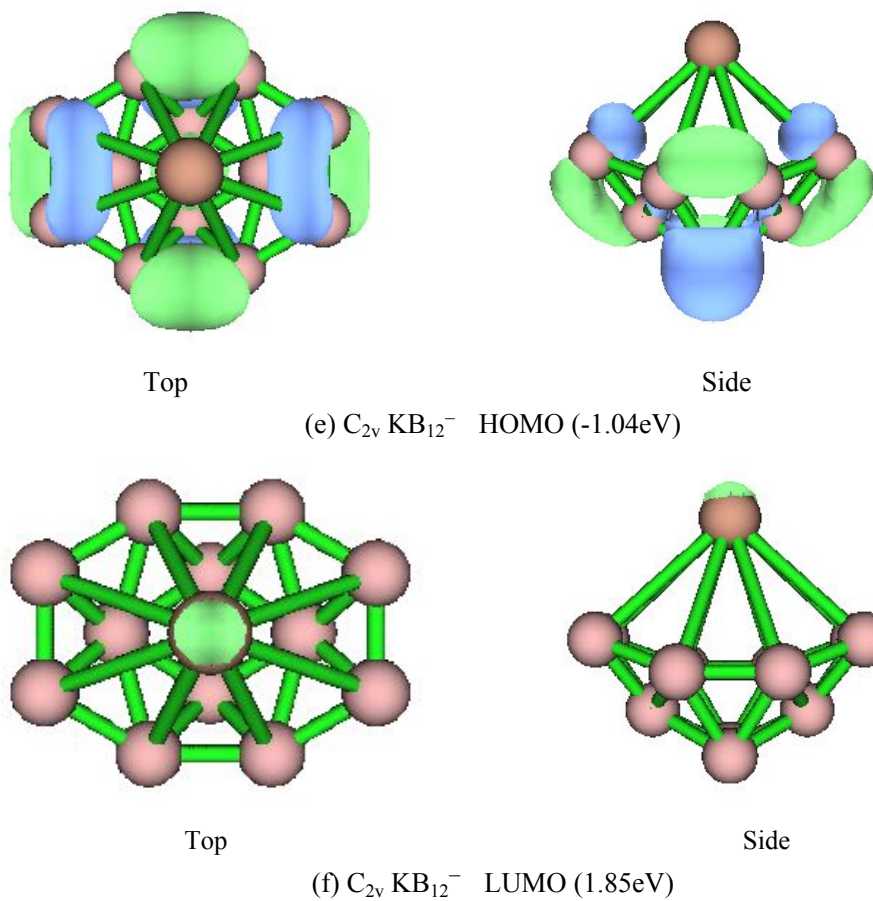

**Figure S8.** Frontline molecular orbital diagrams and energy levels of  $C_{2v} MB_{12}^-$  (M=Li, Na, and K) calculated by the PBE0/def2-TZVP level.

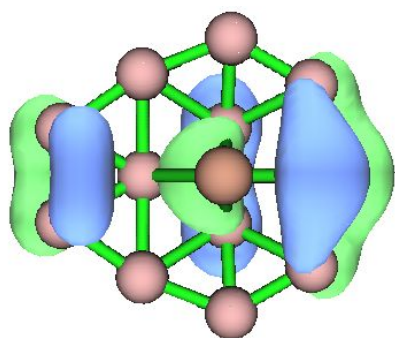

Top

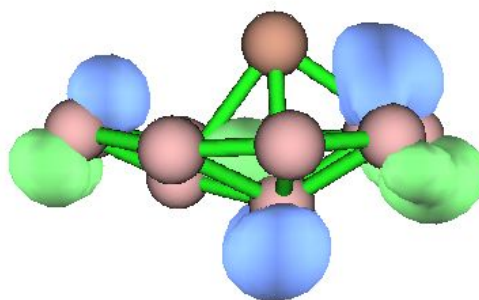

Side

(a) C<sub>s</sub> LiB<sub>12</sub><sup>-</sup> HOMO (-1.04 eV)

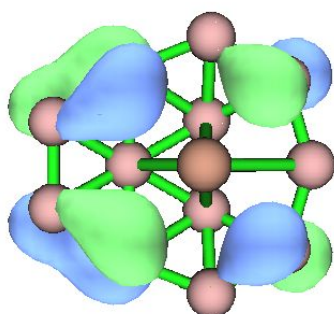

Top

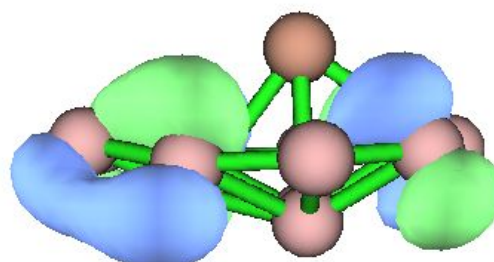

Side

(b) C<sub>s</sub> LiB<sub>12</sub><sup>-</sup> LUMO (1.05 eV)

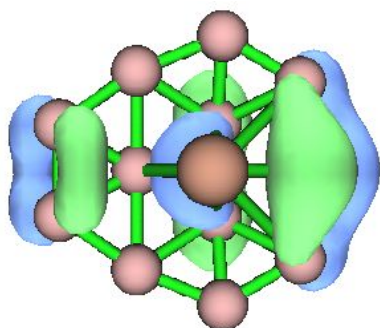

Top

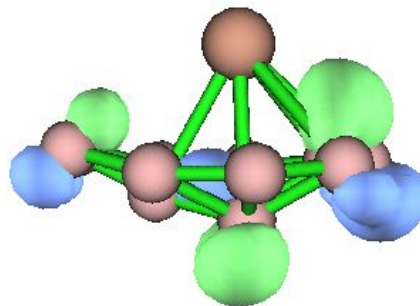

Side

(c) C<sub>s</sub> NaB<sub>12</sub><sup>-</sup> HOMO [-0.81 eV]

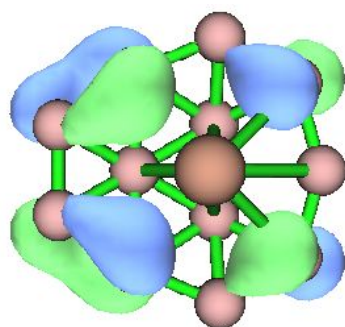

Top

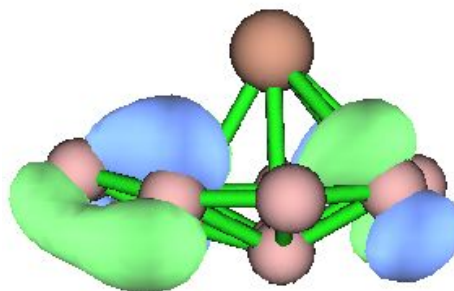

Side

(d) C<sub>s</sub> NaB<sub>12</sub><sup>-</sup> LUMO [1.22eV]

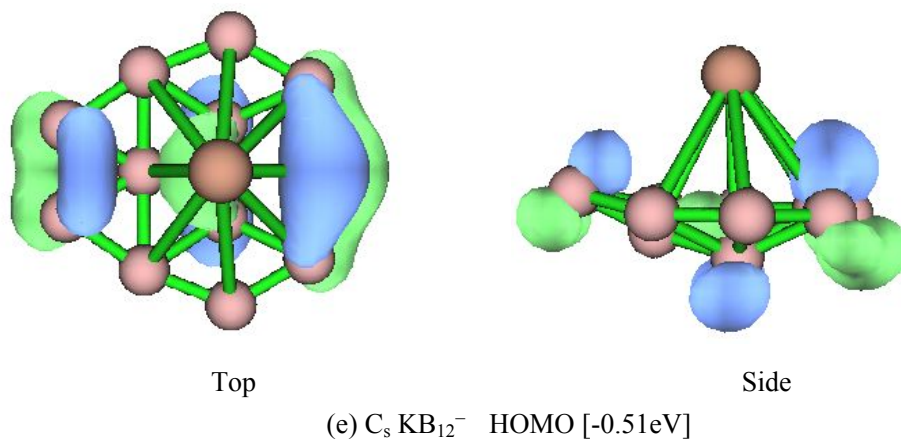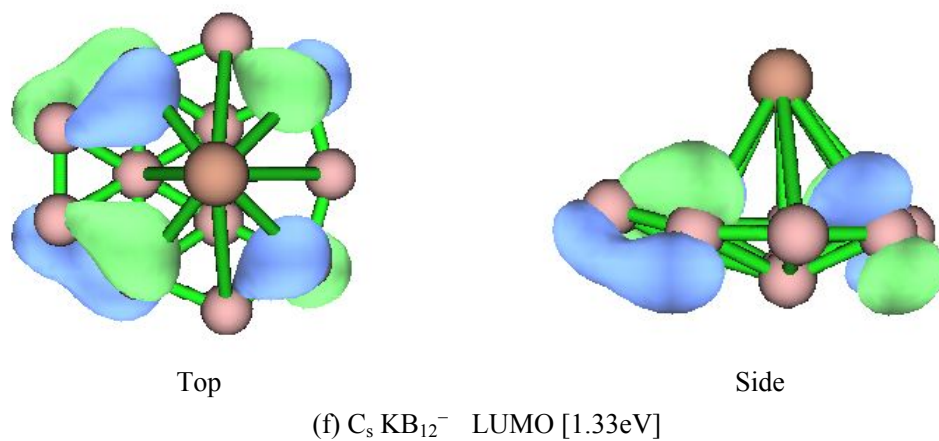

**Figure S9.** Frontline molecular orbital diagrams and energy levels of  $C_s MB_{12}^-$  (M=Li, Na, and K) calculated by the PBE0/def2- TZVP level.
